# Supplementary material for: Precipitation Susceptibility of Marine Stratocumulus with Variable Above and Below-Cloud Aerosol Concentrations over the Southeast Atlantic
Source: Copernicus journal article supplement (doi:10.5194/acp-2021-677), 2021-09-09
Supplement: Supplementary file 1 [file acp-2021-677-supplement.pdf]

The NASA P-3B aircraft was equipped with in situ probes during the NASA Observations of Aerosols above Clouds and their interactions (ORACLES) field campaign. The probes included a Cloud and Aerosol Spectrometer (CAS), Cloud Droplet Probes (CDP), a Phase Doppler Interferometer (PDI, serial number 0491), a 2-Dimensional Stereo Probe (2D-S, serial number 012), and a King hot-wire probe (model KLWC-5, serial number SN-PMI-1058-0704-86). The CAS was a part of the Cloud, Aerosol, and Precipitation Spectrometer (CAPS, model AAA-0009, serial number 5). The P-3 carried a single CDP (CDP-A, serial number 0901-48) during the 2016 Intensive Observation Period (IOP). A second CDP (CDP-B) was added to the P-3 for the 2017 and 2018 (serial number 1206-070) IOPs. CDP-A was replaced by a different CDP (CDP-C, serial number 0604-006) for the 2018 IOP.

The probes were calibrated by the manufacturers before and after each ORACLES IOP. Instrument performance was monitored during the IOPs using calibration tests and auxiliary data, such as temperature and sensor voltages, were monitored during the research flights. Flight legs through aerosol plumes with high (greater than  $1000 \text{ cm}^{-3}$ ) aerosol concentration ( $N_a$ ) were conducted during ORACLES. These plumes contained soot particles that could adversely affect the quality of measurements, especially for the 2D-S. This was addressed by cleaning the optical lenses of the probes with isopropyl before each flight. Gupta et al. (2021) examined the 2D-S measurements and discussed the data processing techniques used to identify and remove data artefacts.

The objective of this supplement was to compare data sets created using measurements from different cloud probes used during ORACLES. The focus was on droplets with diameter ( $D$ ) between 3 and  $50 \mu\text{m}$  since the CAS, CDP, and PDI measured droplets over this size range. The

differences between droplet concentration ( $N_c$ ) and liquid water content ( $LWC$ ) from the CAS, CDP, and PDI data sets were determined. While they may, or may not, be within the uncertainties (Baumgardner et al., 2017), the differences between the data sets were quantified to illustrate that using one instrument versus another could affect the data analysis.

The CAS, CDP, and PDI measurements were compared for each IOP when measurements were available (Table S1). The CAS measurements were invalid before 6 September 2016 and after 7 October 2018 due to an electronics issue. The CDP-A measurements were invalid for the 2016 and 2017 IOPs due to a misalignment of the optical system. The PDI measurements were invalid for the 2017 and 2018 IOPs due to electrical interference on the aircraft, which affected data transfer between the instrument and onboard computers. Hence, the following sections present analyses comparing measurements from the CAS and the PDI for the 2016 IOP, the CAS and the CDP-B for the 2017 and 2018 IOPs, and the CDP-B and the CDP-C for the 2018 IOP. The measurements collected by the horizontal and vertical channels of the 2D-S, which concurrently sample the cloud volume, were compared for the 2017 and 2018 IOPs.

## **2016 IOP - CAS versus PDI**

Nine research flights between 6 and 27 September 2016 were used to create data sets for comparing measurements from the CAS and the PDI (Table S1).  $N_c$  and  $LWC$  were calculated for in-cloud measurements, defined as 1 Hz samples with CAS  $N_c > 10 \text{ cm}^{-3}$ , PDI  $N_c > 10 \text{ cm}^{-3}$ , and King  $LWC > 0.05 \text{ g m}^{-3}$ . The range of the difference between the CAS and PDI data set parameters was defined using the 95 % confidence intervals (CIs) from a two-sample t-test (Table S2 and Table S3). For example, the difference between  $N_c$  for in-cloud CAS and PDI data sets was

determined to be between 9 to 12  $\text{cm}^{-3}$  with 95 % confidence. The average PDI  $N_c$  was  $164 \pm 90$   
45  $\text{cm}^{-3}$  and the average CAS  $N_c$  was  $153 \pm 72 \text{ cm}^{-3}$ , where the error estimates represent the standard  
deviation. The PDI  $N_c$  and the CAS  $N_c$  were well correlated with Pearson's correlation coefficient  
( $R$ ) = 0.88 but their averages had statistically significant differences (Table S2). The PDI more  
frequently sampled  $N_c > 300 \text{ cm}^{-3}$  and  $\text{LWC} > 0.5 \text{ g m}^{-3}$  (1,353 and 3158 1 Hz measurements)  
compared to the CAS (302 and 25 1 Hz measurements) (Figure S1).

50 The average PDI LWC was  $0.35 \pm 0.19 \text{ g m}^{-3}$ , and the average CAS LWC was  $0.15 \pm 0.09 \text{ g}$   
 $\text{m}^{-3}$ . The CAS LWC and PDI LWC were well correlated with  $R = 0.84$  but their averages had  
statistically significant differences (Table S3). The King LWC had an average of  $0.28 \pm 0.15 \text{ g m}^{-3}$   
for the in-cloud data. The average PDI LWC was higher than the average King LWC (95 % CIs: 0.06  
to  $0.07 \text{ g m}^{-3}$  higher,  $R = 0.78$ ) while the average CAS LWC was lower than the average King LWC  
55 (95 % CIs: 0.13 to  $0.14 \text{ g m}^{-3}$  lower,  $R = 0.80$ ).

Vertical profiles of CAS LWC, PDI LWC, and King LWC were compared against the adiabatic  
LWC (hereafter  $\text{LWC}_{\text{ad}}$ ) (Figure S2) for in-cloud measurements from cloud profiles flown on the  
six 2016 research flights used for data analysis (Table S1). The average CAS LWC and King LWC  
were lower than the average  $\text{LWC}_{\text{ad}}$  (95 % CIs: 0.16 to  $0.17 \text{ g m}^{-3}$  lower for CAS LWC and 0.01 to  
60  $0.03 \text{ g m}^{-3}$  lower for King LWC). However, the average PDI LWC was higher than the average  $\text{LWC}_{\text{ad}}$   
(95 % CIs: 0.04 to  $0.06 \text{ g m}^{-3}$  higher). The PDI LWC exceeded  $\text{LWC}_{\text{ad}}$  over the entire cloud layer  
except the top 10 %, the CAS LWC exceeded  $\text{LWC}_{\text{ad}}$  for the bottom 10 %, and the King LWC  
exceeded  $\text{LWC}_{\text{ad}}$  for the bottom 40 % of the cloud layer. Marine stratocumulus are typically sub-  
adiabatic due to cloud-top entrainment and droplet evaporation (Gupta et al., 2021) or cloud

65 water removal by precipitation. Since the  $LWC_{ad}$  represents the theoretical maximum for LWC based on the adiabatic model (Section 3), these results suggest the PDI LWC was an overestimate.

The CAS  $N_c$  and the PDI  $N_c$  had larger differences (with lower  $R$ ) when the CAS  $N_c$  and PDI  $N_c$  both exceeded  $200 \text{ cm}^{-3}$  (Table S2). On the other hand, for about 65 % of the measurements with CAS  $N_c$  and PDI  $N_c < 200 \text{ cm}^{-3}$ , the CAS  $N_c$  and PDI  $N_c$  had insignificant differences while the  
70 CAS LWC and PDI LWC had significant differences for the measurements (Table S3). No obvious trends were observed for these differences as a function of altitude or pitch angle (not shown).

The skewness ( $\alpha$ ) and mean radius ( $r_1$ ) were calculated for the CAS and PDI in-cloud measurements.  $r_1$  and  $\alpha$  were negatively correlated for each probe with  $R = -0.59$  for the CAS and  $R = -0.65$  for the PDI (Figure S3). Over 60 % of the samples had  $\alpha_{PDI} < 2$ , CAS  $N_c < 200 \text{ cm}^{-3}$ ,  
75 and PDI  $N_c < 200 \text{ cm}^{-3}$  (Table S2). For these samples, there were insignificant differences between the average CAS  $N_c$  and PDI  $N_c$  (Table S3), but the PDI LWC was significantly higher than CAS LWC (Table S3). This was because the average PDI  $r_1$  was  $2.1 \mu\text{m}$  higher than the average CAS  $r_1$ . The data samples with PDI  $N_c > 200 \text{ cm}^{-3}$  were associated with  $r_1 < 10 \mu\text{m}$  and  $\alpha_{PDI} > 1$  (Figure S3). Higher PDI LWC compared to the CAS LWC, King LWC, and  $LWC_{ad}$  with statistically significant  
80 differences suggests the PDI could be oversampling droplets with  $D > r_1$  since LWC is dominated by the contribution of larger droplets. This would explain the statistically significant differences between the CAS LWC and the PDI LWC despite smaller or statistically insignificant differences between the CAS  $N_c$  and the PDI  $N_c$ . Based on these comparisons, measurements from the CAS were used to characterize droplets with  $3 < D < 50 \mu\text{m}$  for the 2016 IOP in the absence of  
85 measurements from the CDP-A.

## 2017 IOP - CAS versus CDP-B

The CAS and the CDP-B data sets were created using in-cloud measurements defined as 1 Hz samples with CAS  $N_c > 10 \text{ cm}^{-3}$ , CDP-B  $N_c > 10 \text{ cm}^{-3}$ , and King LWC  $> 0.05 \text{ g m}^{-3}$ . For in-cloud measurements collected over 12 research flights during the 2017 IOP, the average CDP-B  $N_c$  ( $192 \pm 123 \text{ cm}^{-3}$ ) and CDP-B LWC ( $0.18 \pm 0.16 \text{ g m}^{-3}$ ) were greater than the average CAS  $N_c$  ( $181 \pm 96 \text{ cm}^{-3}$ ) and CAS LWC ( $0.09 \pm 0.07 \text{ g m}^{-3}$ ) (Figure S4). The average King LWC ( $0.21 \pm 0.15 \text{ g m}^{-3}$ ) was higher than the average CDP-B LWC (95 % CIs: 0.01 to 0.02  $\text{g m}^{-3}$  higher,  $R = 0.68$ ) and the average CAS LWC (95 % CIs: 0.10 to 0.11  $\text{g m}^{-3}$  higher,  $R = 0.78$ ).

For the research flights flown on 30 and 31 August 2017, the average CDP-B  $N_c$  ( $109 \pm 39 \text{ cm}^{-3}$ ) and CDP-B LWC ( $0.05 \pm 0.04 \text{ g m}^{-3}$ ) were 96  $\text{cm}^{-3}$  and 0.16  $\text{g m}^{-3}$  lower than the CDP-B  $N_c$  and CDP-B LWC averaged over the other flights. The average CAS  $N_c$  ( $146 \pm 46 \text{ cm}^{-3}$ ) and CAS LWC ( $0.11 \pm 0.05 \text{ g m}^{-3}$ ) for these two flights were 41  $\text{cm}^{-3}$  lower and 0.02  $\text{g m}^{-3}$  higher than their corresponding averages. The average King LWC for these flights ( $0.18 \pm 0.10 \text{ g m}^{-3}$ ) was 0.03  $\text{g m}^{-3}$  lower than the average King LWC for other flights. Since the relative changes in King LWC and CAS LWC compared to other flights were much smaller, it is unlikely the CDP-B measurements from 30 and 31 August 2017 were accurate. The CDP-B measurements from 30 and 31 August did not impact the results presented in this study since these flights were not included in the data analysis (Table S1) because few cloud profiles were conducted during these flights. However, the data from these flights were excluded from data sets created for comparing the in-cloud CAS and CDP-B measurements for the 2017 IOP.

The 10 research flights between 12 August and 2 September 2017 were used to create data sets for comparing  $N_c$  and LWC from the CAS and the CDP-B in-cloud measurements (Figure S4). 95 % CIs between the  $N_c$  and LWC from the CAS and the CDP-B are listed in Table S4 and Table S5, respectively. The CDP-B more frequently sampled  $N_c > 300 \text{ cm}^{-3}$  (2536 1 Hz measurements) than the CAS (1623 1 Hz measurements). The average CDP-B  $N_c$  was higher than the average CAS  $N_c$  with  $R = 0.91$  (Table S4). For 75 % of the samples with CDP-B  $N_c < 300 \text{ cm}^{-3}$ , CAS  $N_c$  and CDP-B  $N_c$  had small differences (95 % CIs: 1 to 5  $\text{cm}^{-3}$ ) but the average CDP-B LWC and CAS LWC had statistically significant differences (Table S5). This was because the average CDP-B  $r_1$  was higher than the average CAS  $r_1$  (95 % CIs: 1.4 to 1.5  $\mu\text{m}$  higher).

The average King LWC ( $0.19 \pm 0.13 \text{ g m}^{-3}$ ) was comparable to the average CDP-B LWC ( $0.18 \pm 0.13 \text{ g m}^{-3}$ ) while the average CAS LWC ( $0.08 \pm 0.06 \text{ g m}^{-3}$ ) was lower than CDP-B LWC and King LWC. The CAS LWC, CDP-B LWC, and King LWC were compared against  $\text{LWC}_{\text{ad}}$  (Figure S5) for in-cloud measurements from cloud profiles flown on the seven research flights from the 2017 IOP used for data analysis (Table S1). The average  $\text{LWC}_{\text{ad}}$  was greater than each LWC estimate but the differences with CAS LWC (95 % CIs: 0.17 to 0.19  $\text{g m}^{-3}$  higher) were higher than with CDP-B LWC (95 % CIs: 0.05 to 0.07  $\text{g m}^{-3}$  higher). Thus, measurements from the CDP-B were used to characterize droplets with  $3 < D < 50 \mu\text{m}$  for the 2017 IOP.

## 2018 IOP - CAS versus CDP-B

For the 2018 IOP,  $N_c$  and LWC from the CAS and the CDP-B were compared using data sets created from the in-cloud measurements on six research flights until the CAS was operational (Table S1). These comparisons were consistent with the CAS versus CDP-B comparisons for the

2017 IOP. The average CDP-B  $N_c$  ( $125 \pm 92 \text{ cm}^{-3}$ ) was higher than the average CAS  $N_c$  ( $106 \pm 67 \text{ cm}^{-3}$ ) with statistically significant differences (95 % CIs: 15 to 21  $\text{cm}^{-3}$  higher,  $R = 0.88$ ) (Figure S6). The average CDP-B LWC ( $0.21 \pm 0.14 \text{ g m}^{-3}$ ) was closer to the average King LWC ( $0.20 \pm 0.12 \text{ g m}^{-3}$ ) compared to the average CAS LWC ( $0.10 \pm 0.07 \text{ g m}^{-3}$ ). The average  $\text{LWC}_{\text{ad}}$  was closer to the average CDP-B LWC (95 % CIs: 0.04 to 0.06  $\text{g m}^{-3}$  higher) and the average King LWC (95 % CIs: 0.07 to 0.08  $\text{g m}^{-3}$  higher) compared to the average CAS LWC (95 % CI: 0.18 to 0.19  $\text{g m}^{-3}$  higher). It was hypothesized that the CDP-B provided better estimates of  $N(D)$  for droplets with  $3 < D < 50 \mu\text{m}$  compared to the CAS for the first six research flights from the 2018 IOP.

Based on these comparisons, the CAS could be under-sizing droplets or under-sampling certain droplets during the 2017 and 2018 IOPs. The differences between the data sets from the CAS and the other instruments could be due to droplet co-incidence in the CAS sample volume. It is possible the air flow into the CAS inlet tube could have affected the droplets entering the CAS sample volume compared to the CDP-B sample volume (which had a more open path for droplets). The differences between the estimates of  $N_c$  and LWC from the CAS and CDP-B for the 2017 IOP increased slightly when the absolute value of pitch angle exceeded  $0.5^\circ$  (Table S4 and Table S5). However, this was not observed for data collected during the 2018 IOP. No obvious trends were observed for these differences as a function of altitude or the skewness from the CAS and the CDP-B  $N(D)$  (not shown).

#### 2018 IOP - CDP-B versus CDP-C

During the 2016 IOP, cloud probes were installed on newly designed pylons that placed the instruments directly underneath the wing rather than slightly ahead of its leading edge as

commonly regarded as best practice (McFarquhar et al. 2007; Afchine et al. 2018). There was concern that the air flow into a probe sample volume could have been affected by airflow perturbations induced by the wing (Weigel et al. 2016), potentially affecting the size distributions and the calculation of  $N_c$ , LWC, and other microphysical parameters. To investigate this, a new pylon was designed at the NASA Wallops Flight Facility and installed on one wing for the 2017 and 2018 IOPs. This pylon placed the CAS and the CDP-B slightly lower and ahead of the leading edge of the aircraft wing, compared to other probes. Therefore, the CDP-B and CDP-C were mounted at different locations relative to the aircraft wing.

The mounting locations of the CDP-B and CDP-C were switched halfway through the 2018 IOP to isolate instrument differences caused by the pylons from those caused by the CDP probes. O'Brien et al. (2021, in prep.) compared the in-cloud measurements from CDP-B and CDP-C and found the mounting position of the probes had only a 6 % impact on the calculation of  $N_c$  with the average CDP-B LWC and CDP-C LWC being within  $0.02 \text{ g m}^{-3}$ . To maintain consistency with the 2017 IOP, in-cloud measurements from the CDP mounted on the new pylon (next to the CAS) were used for data analysis (Table S1) except for 15 October 2018 when the CDP-C, placed on the new pylon, erroneously sampled large  $N_c$  due to a qualifier voltage issue. However, the use of measurements from the CDP mounted on the old pylon is unlikely to have a significant impact on the data analysis.

## **2017 and 2018 IOPs - 2D-S horizontal and vertical channel**

$N_c$  and LWC were derived using the in-cloud measurements from the horizontal ( $N_H$  and  $LWC_H$ ) and vertical ( $N_V$  and  $LWC_V$ ) channels of the 2D-S.  $N_H$ ,  $N_V$ ,  $LWC_H$ , and  $LWC_V$  were computed



for 3,966 and 7,612 1 Hz in-cloud measurements with  $LWC_H$  and  $LWC_V$  between 0.001 to  $1 \text{ g m}^{-3}$  collected during 7 and 12 research flights from the 2017 and 2018 IOPs, respectively. Based on a linear regression model,  $N_H$  and  $N_V$  (Figure S7) as well as  $LWC_H$  and  $LWC_V$  (Figure S8) were highly correlated for the 2017 and 2018 IOPs. Only  $N_H$  and  $LWC_H$  were available for the 2016 IOP because of soot deposition on the inside of the receive-side mirror of the 2D-S vertical channel. To maintain consistency between the three IOPs,  $N_H$  and  $LWC_H$  were used in this study despite the availability of  $N_V$  and  $LWC_V$  for the 2017 and 2018 IOPs. The high correlations suggest little difference would have resulted in the data analysis from using the average of the 2D-S channels.

180

185

190

195

200

Table S1: P-3 research flights (PRFs) from ORACLES used for data analysis along with instruments that provided valid samples of droplets with  $3 < D < 50 \mu\text{m}$  during the PRF (primary instrument for data analysis in bold).

| PRF date     | PRF used | Instruments               |
|--------------|----------|---------------------------|
| Aug 30 2016  | No       | Aborted flight            |
| Aug 31 2016  | No       | PDI                       |
| Sept 02 2016 | No       | PDI                       |
| Sept 04 2016 | No       | PDI                       |
| Sept 06 2016 | Yes      | <b>CAS</b> , PDI          |
| Sept 08 2016 | No       | <b>CAS</b> , PDI          |
| Sept 10 2016 | Yes      | <b>CAS</b> , PDI          |
| Sept 12 2016 | Yes      | <b>CAS</b> , PDI          |
| Sept 14 2016 | Yes      | <b>CAS</b> , PDI          |
| Sept 18 2016 | No       | <b>CAS</b> , PDI          |
| Sept 20 2016 | Yes      | <b>CAS</b> , PDI          |
| Sept 24 2016 | No       | <b>CAS</b> , PDI          |
| Sept 25 2016 | Yes      | <b>CAS</b> , PDI          |
| Aug 12 2017  | Yes      | CAS, <b>CDP-B</b>         |
| Aug 13 2017  | Yes      | CAS, <b>CDP-B</b>         |
| Aug 15 2017  | Yes      | CAS, <b>CDP-B</b>         |
| Aug 17 2017  | Yes      | CAS, <b>CDP-B</b>         |
| Aug 18 2017  | No       | CAS, <b>CDP-B</b>         |
| Aug 19 2017  | No       | Aborted flight            |
| Aug 21 2017  | Yes      | CAS, <b>CDP-B</b>         |
| Aug 24 2017  | Yes      | CAS, <b>CDP-B</b>         |
| Aug 26 2017  | No       | CAS, <b>CDP-B</b>         |
| Aug 28 2017  | No       | CAS, <b>CDP-B</b>         |
| Aug 30 2017  | No       | <b>CAS</b> , CDP-B        |
| Aug 31 2017  | No       | <b>CAS</b> , CDP-B        |
| Sept 02 2017 | No       | CAS, <b>CDP-B</b>         |
| Sept 27 2018 | Yes      | CAS, <b>CDP-B</b> , CDP-C |
| Sept 30 2018 | Yes      | CAS, <b>CDP-B</b> , CDP-C |
| Oct 02 2018  | No       | CAS, <b>CDP-B</b> , CDP-C |
| Oct 03 2018  | Yes      | CAS, <b>CDP-B</b> , CDP-C |
| Oct 05 2018  | Yes      | CAS, <b>CDP-B</b> , CDP-C |
| Oct 07 2018  | Yes      | CAS, <b>CDP-B</b> , CDP-C |
| Oct 10 2018  | Yes      | <b>CDP-B</b> , CDP-C      |
| Oct 12 2018  | Yes      | CDP-B, <b>CDP-C</b>       |

|             |     |                     |
|-------------|-----|---------------------|
| Oct 15 2018 | Yes | <b>CDP-B, CDP-C</b> |
| Oct 17 2018 | No  | CDP-B, <b>CDP-C</b> |
| Oct 19 2018 | Yes | CDP-B, <b>CDP-C</b> |
| Oct 21 2018 | Yes | CDP-B, <b>CDP-C</b> |
| Oct 23 2018 | Yes | CDP-B, <b>CDP-C</b> |

210 Table S2: 95 % confidence intervals (CIs) for differences between CAS and PDI  $N_c$  (positive when average PDI  $N_c$  higher) determined using a two-sample t-test. Number of 1 Hz measurements ( $n$ ), correlation co-efficient ( $R$ ) and p-value ( $p$ ) listed for various criteria applied to the CAS and the CDP  $N(D)$ , where  $\alpha$  refers to skewness. Best-fit slope ( $M_o$ ) and intercept ( $C_o$ ) were determined using linear regression for CAS data as a function of PDI data.

| Criteria                                                     | n     | CIs ( $\text{cm}^{-3}$ ) | $R$  | $p$  | $M_o$ | $C_o$ ( $\text{cm}^{-3}$ ) |
|--------------------------------------------------------------|-------|--------------------------|------|------|-------|----------------------------|
| All data                                                     | 16559 | 9 to 12                  | 0.88 | 0    | 0.70  | 38                         |
| CAS and PDI $N_c > 300 \text{ cm}^{-3}$                      | 243   | 67 to 90                 | 0.46 | 0    | 0.12  | 273                        |
| CAS and PDI $N_c < 300 \text{ cm}^{-3}$                      | 15147 | 2 to 5                   | 0.88 | 0    | 0.81  | 24                         |
| CAS and PDI $N_c > 200 \text{ cm}^{-3}$                      | 4076  | 32 to 37                 | 0.64 | 0    | 0.32  | 156                        |
| CAS and PDI $N_c < 200 \text{ cm}^{-3}$                      | 10832 | -2 to 1                  | 0.83 | 0.32 | 0.82  | 21                         |
| $\alpha_{PDI} < 2$                                           | 14311 | 4 to 7                   | 0.89 | 0    | 0.76  | 31                         |
| $\alpha_{PDI} > 2$                                           | 2248  | 37 to 48                 | 0.85 | 0    | 0.58  | 60                         |
| $\alpha_{PDI} < 2,$<br>CAS & PDI $N_c < 200 \text{ cm}^{-3}$ | 10066 | -3 to 0                  | 0.83 | 0.06 | 0.82  | 21                         |

Table S3: Same as Table S2, but the parameters correspond to comparisons between CAS and PDI LWC. The CIs were positive when the average PDI LWC was higher.

| Criteria                                                     | n     | CIs ( $\text{g m}^{-3}$ ) | $R$  | $p$ | $M_o$ | $C_o$ ( $\text{g m}^{-3}$ ) |
|--------------------------------------------------------------|-------|---------------------------|------|-----|-------|-----------------------------|
| All data                                                     | 16559 | 0.20 to 0.20              | 0.84 | 0   | 0.40  | 0.01                        |
| CAS and PDI $N_c > 300 \text{ cm}^{-3}$                      | 243   | 0.25 to 0.31              | 0.92 | 0   | 0.36  | 0.02                        |
| CAS and PDI $N_c < 300 \text{ cm}^{-3}$                      | 15147 | 0.19 to 0.20              | 0.84 | 0   | 0.42  | 0.01                        |
| CAS and PDI $N_c > 200 \text{ cm}^{-3}$                      | 4076  | 0.23 to 0.25              | 0.93 | 0   | 0.38  | 0.01                        |
| CAS and PDI $N_c < 200 \text{ cm}^{-3}$                      | 10832 | 0.19 to 0.19              | 0.81 | 0   | 0.41  | 0.01                        |
| $\alpha_{PDI} < 2$                                           | 14311 | 0.21 to 0.21              | 0.83 | 0   | 0.40  | 0.01                        |
| $\alpha_{PDI} > 2$                                           | 2248  | 0.15 to 0.16              | 0.92 | 0   | 0.35  | 0.01                        |
| $\alpha_{PDI} < 2,$<br>CAS & PDI $N_c < 200 \text{ cm}^{-3}$ | 10066 | 0.19 to 0.20              | 0.79 | 0   | 0.41  | 0.01                        |

Table S4: Same as Table S2, but the parameters correspond to comparisons between CAS  $N_c$  and CDP-B  $N_c$  from 10 research flights during 2017 IOP (positive CIs when the average CDP  $N_c$  was higher and linear regression coefficients listed for CAS data as function of CDP-B data).

| <b>Criteria</b>                  | <b>n</b> | <b>CI<sub>s</sub> (cm<sup>-3</sup>)</b> | <b>R</b> | <b>p</b> | <b><math>M_o</math></b> | <b><math>C_o</math> (cm<sup>-3</sup>)</b> |
|----------------------------------|----------|-----------------------------------------|----------|----------|-------------------------|-------------------------------------------|
| All data (excluding 08/30, 31)   | 11438    | 16 to 22                                | 0.91     | 0        | 0.73                    | 37                                        |
| CDP $N_c > 300$ cm <sup>-3</sup> | 2536     | 73 to 80                                | 0.62     | 0        | 0.54                    | 102                                       |
| CDP $N_c < 300$ cm <sup>-3</sup> | 8902     | 1 to 5                                  | 0.87     | 0.01     | 0.84                    | 20                                        |
| pitch < - 0.5° or pitch > 0.5°   | 8445     | 18 to 25                                | 0.90     | 0        | 0.70                    | 42                                        |
| - 0.5° < pitch < 0.5°            | 2961     | 8 to 20                                 | 0.91     | 0        | 0.80                    | 23                                        |

220

Table S5: Same as Table S4, but parameters correspond to comparisons between CAS LWC and CDP-B LWC.

| <b>Criteria</b>                  | <b>n</b> | <b>CI (g m<sup>-3</sup>)</b> | <b>R</b> | <b>p</b> | <b><math>M_o</math></b> | <b><math>C_o</math> (g m<sup>-3</sup>)</b> |
|----------------------------------|----------|------------------------------|----------|----------|-------------------------|--------------------------------------------|
| All data (excluding 08/30, 31)   | 11438    | 0.11 to 0.12                 | 0.82     | 0        | 0.37                    | 0.01                                       |
| CDP $N_c > 300$ cm <sup>-3</sup> | 2536     | 0.17 to 0.19                 | 0.85     | 0        | 0.40                    | 0.00                                       |
| CDP $N_c < 300$ cm <sup>-3</sup> | 8902     | 0.09 to 0.10                 | 0.80     | 0        | 0.37                    | 0.02                                       |
| pitch < - 0.5° or pitch > 0.5°   | 8445     | 0.12 to 0.12                 | 0.83     | 0        | 0.37                    | 0.01                                       |
| - 0.5° < pitch < 0.5°            | 2961     | 0.10 to 0.11                 | 0.79     | 0        | 0.39                    | 0.02                                       |

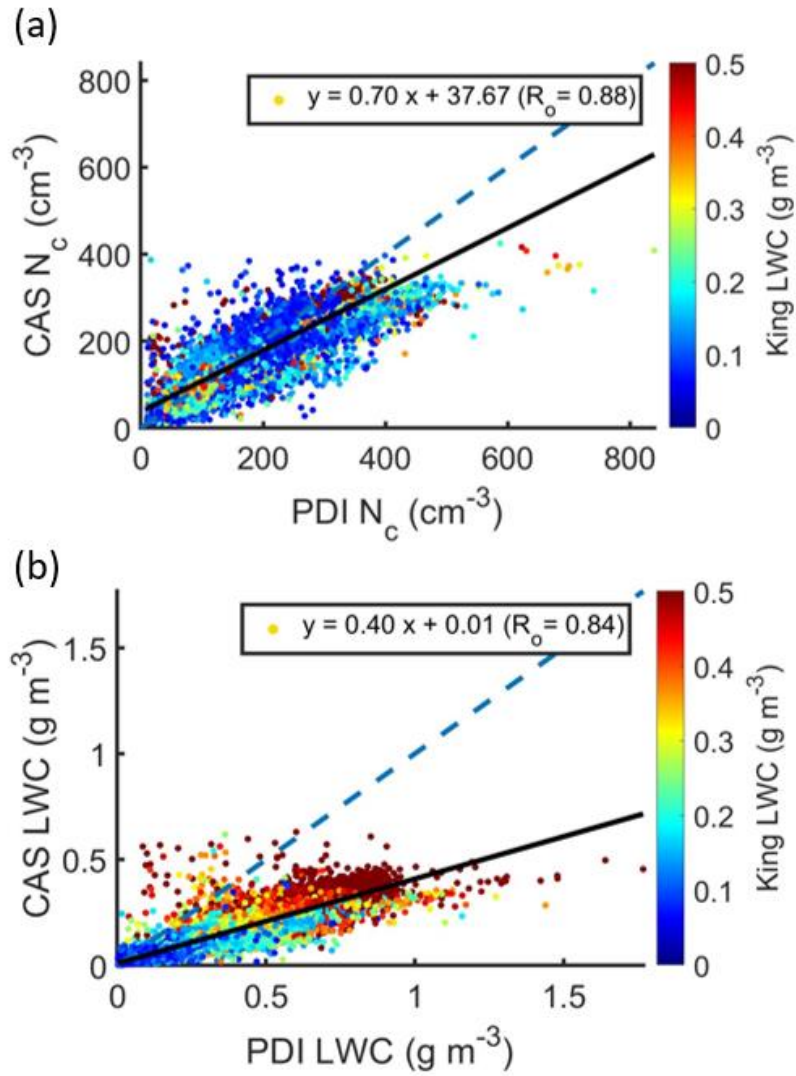

225 Figure S1: (a)  $N_c$  and (b) LWC measured by CAS against that measured by PDI during 2016 IOP. Each dot represents a 1 Hz data sample colored by King LWC. Linear regression coefficients indicated in legend.

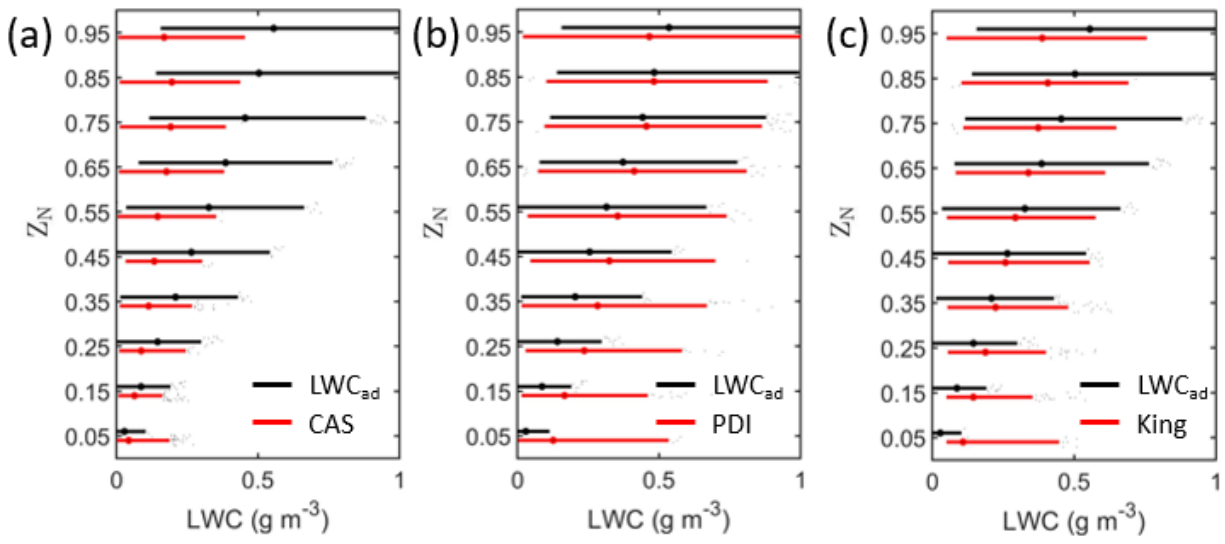

230 Figure S2: Boxplots representing profiles of (a) CAS LWC, (b) PDI LWC, and (c) King LWC with adiabatic LWC ( $LWC_{ad}$ ) as function of normalized height above cloud base ( $Z_N$ ). These data represent cloud samples from cloud profiles flown during the six research flights from 2016 IOP used for data analysis.

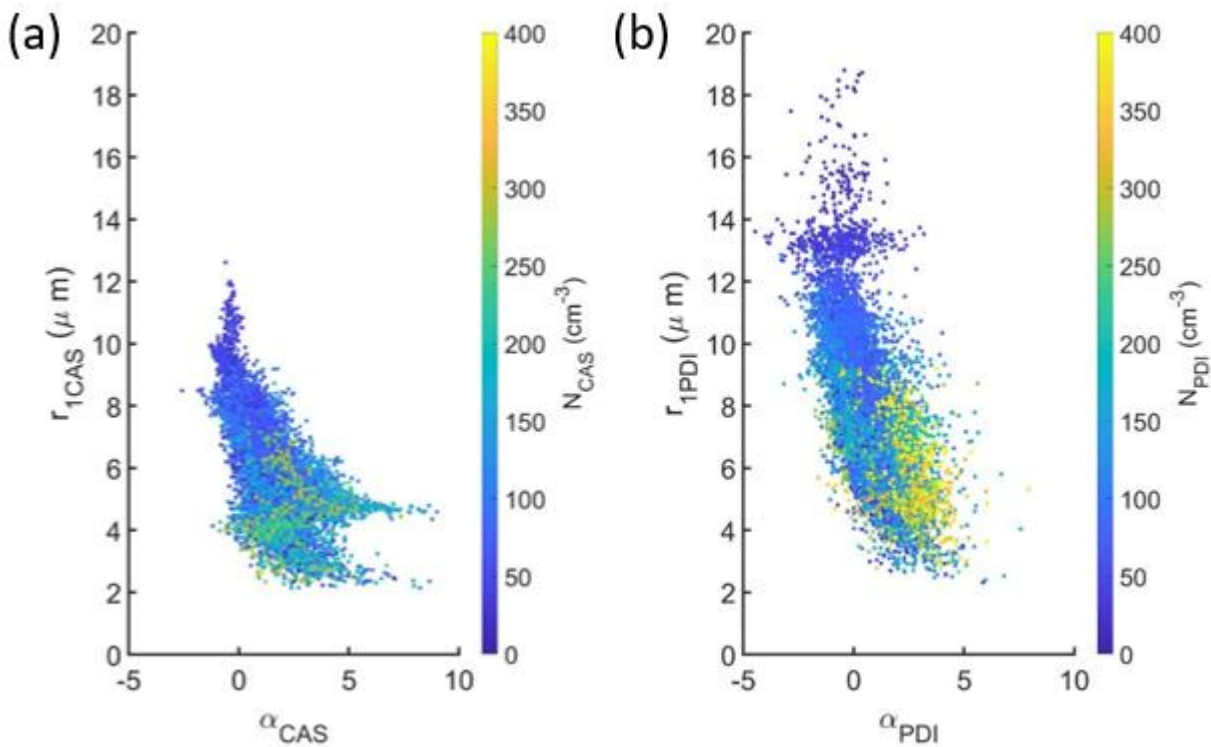

235 Figure S3: Mean radius ( $r_1$ ) versus skewness ( $\alpha$ ) for (a) CAS and (b) PDI droplet size distributions. Each dot represents a 1 Hz sample colored by the corresponding droplet concentration.

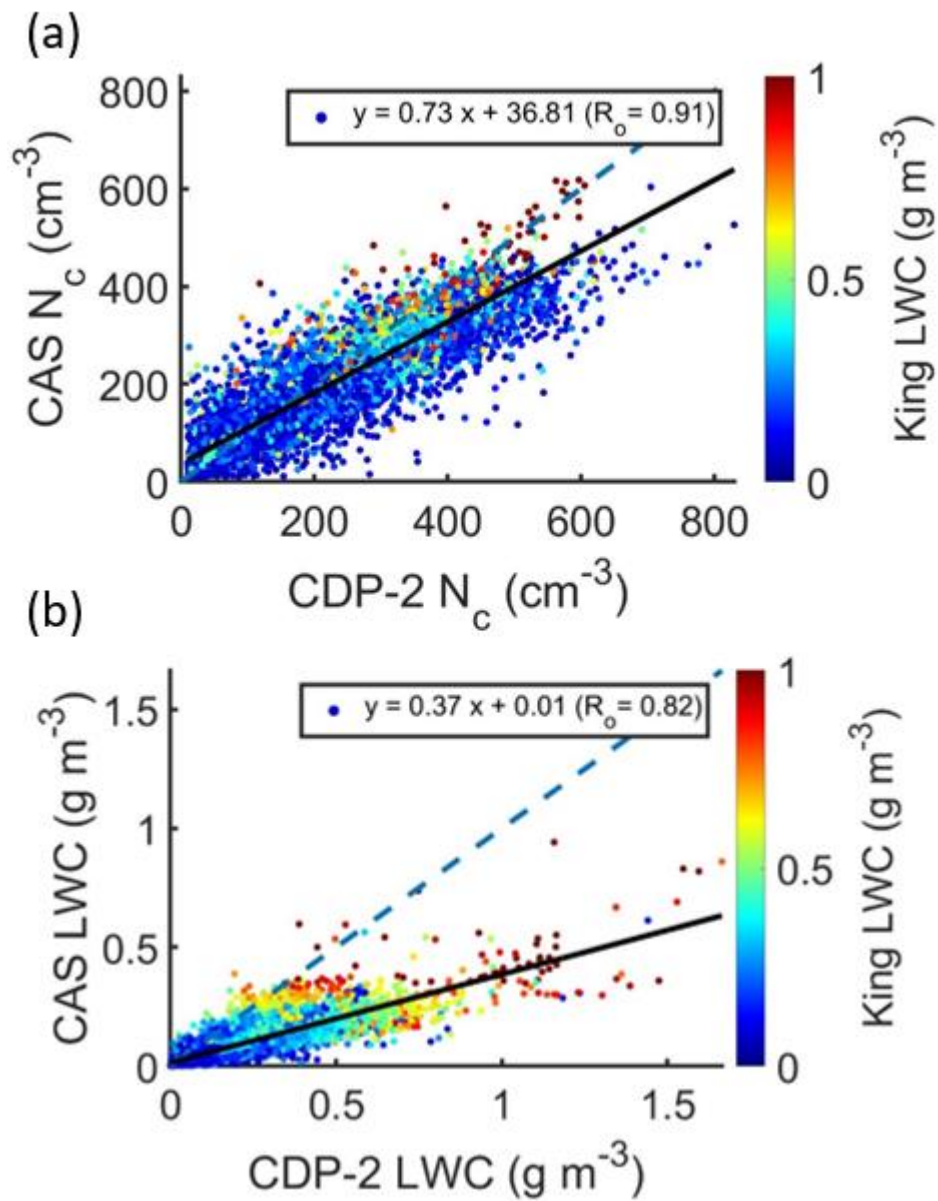

240 Figure S4: Scatter plots comparing (a)  $N_c$  and (b) LWC measured by CAS and CDP-B during 2017 IOP excluding data from 30 and 31 August 2017. Each dot represents a 1 Hz data sample colored by King LWC. Linear regression coefficients indicated in legend.

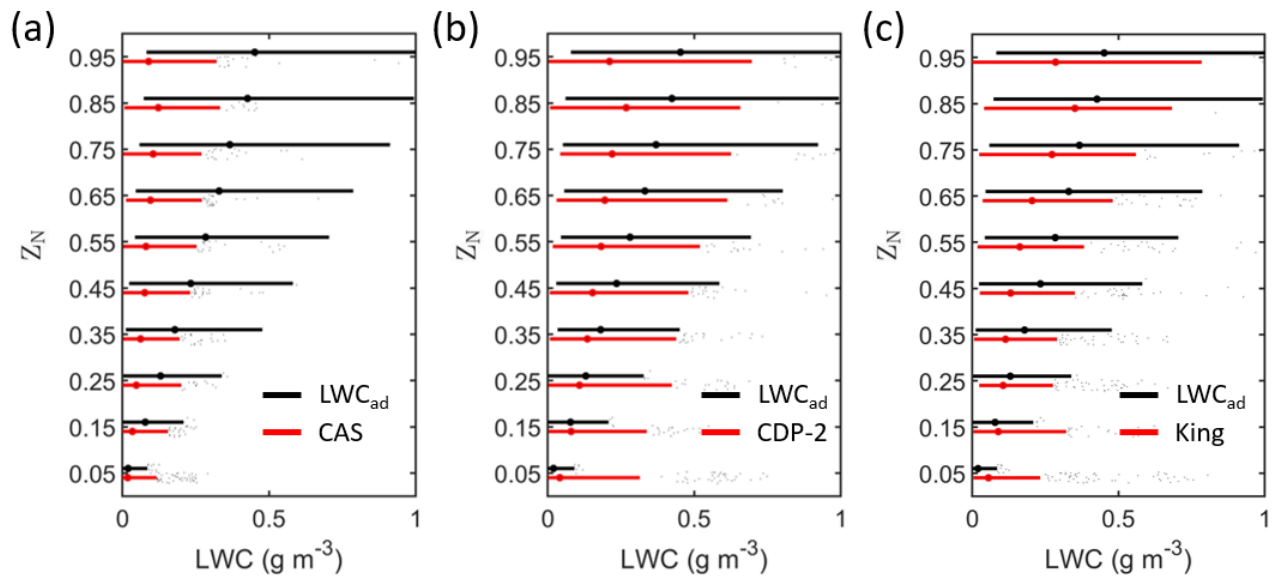

245 Figure S5: Boxplots representing the vertical profiles of (a) CAS LWC, (b) CDP-B LWC, and (c) King LWC with LWC<sub>ad</sub> as function of Z<sub>N</sub>. These data represent cloud samples from cloud profiles flown during the seven research flights from 2017 IOP used for data analysis.



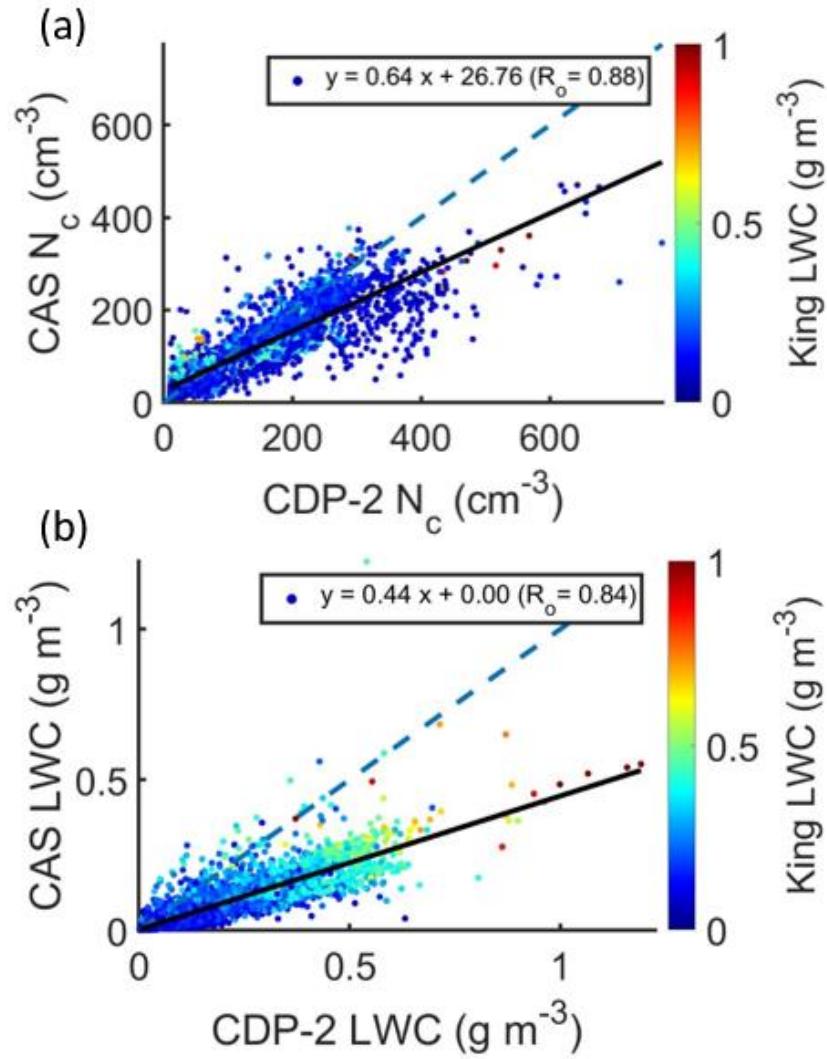

Figure S6: Scatter plots comparing (a)  $N_c$  and (b) LWC measured by CAS and CDP-B during 2018 IOP for six research flights when CAS was operational. Each dot represents a 1 Hz data sample colored by King LWC. Linear regression coefficients indicated in legend.

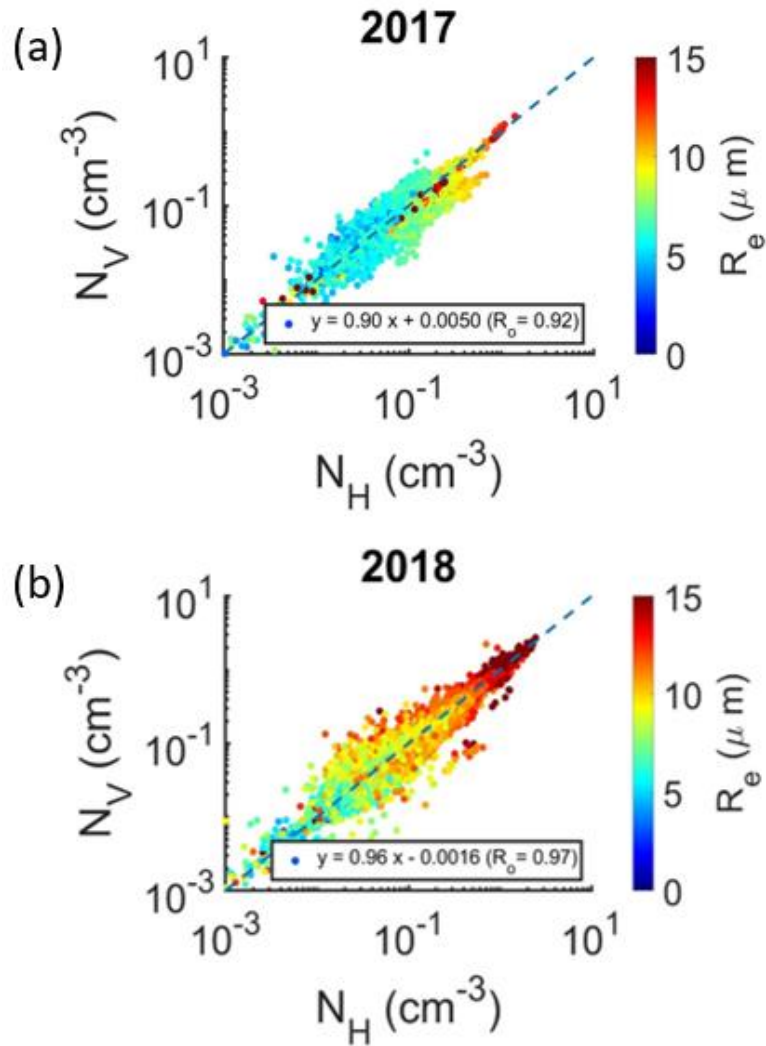

255

Figure S7: Droplet concentration measured by vertical array of 2D-S ( $N_V$ ) as function of droplet concentration measured by horizontal array of 2D-S ( $N_H$ ) for (a) 2017 and (b) 2018 IOP. Each data point represents a 1 Hz sample colored by  $R_e$  for cloud profiles flown during the research flights from 2017 and 2018 IOP used for data analysis. Linear regression coefficients indicated in legend.

260

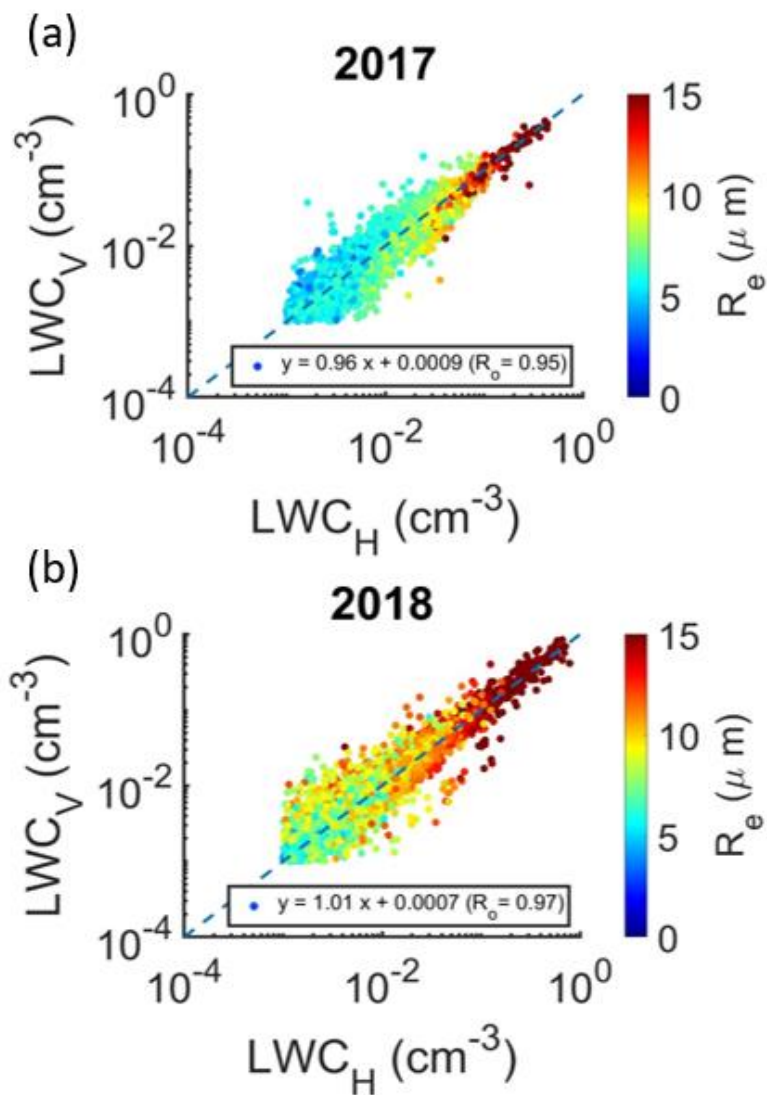

Figure S8: Same as Fig. S7, comparing  $LWC_H$  and  $LWC_V$  for (a) 2017 and (b) 2018 IOP.
